# Supplementary material for: Use of Cells Expressing γ Subunit Variants to Identify Diverse Mechanisms of AMPK Activation
Source: PubMed Central journal article supplement (PMC2935965; doi:10.1016/j.cmet.2010.04.001), 2010-06-09
Supplement: mmc1.pdf [file mmc1.pdf]

## **Supplemental Information**

### **Use of Cells Expressing $\gamma$ Subunit Variants to Identify Diverse Mechanisms of AMPK Activation**

**Simon A. Hawley, Fiona A. Ross, Cyrille Chevtzoff, Kevin A. Green,  
Ashleigh Evans, Sarah Fogarty, Mhairi C. Towler, Laura J. Brown,  
Oluseye A. Ogunbayo, A. Mark Evans, and D. Grahame Hardie**

## **Supplemental Results**

Measurements of oxygen uptake in RG cells, obtained under identical conditions to those in WT cells

Fig. 6A and 6B, are displayed in Figure S1.

# Hawley et al Figure S1

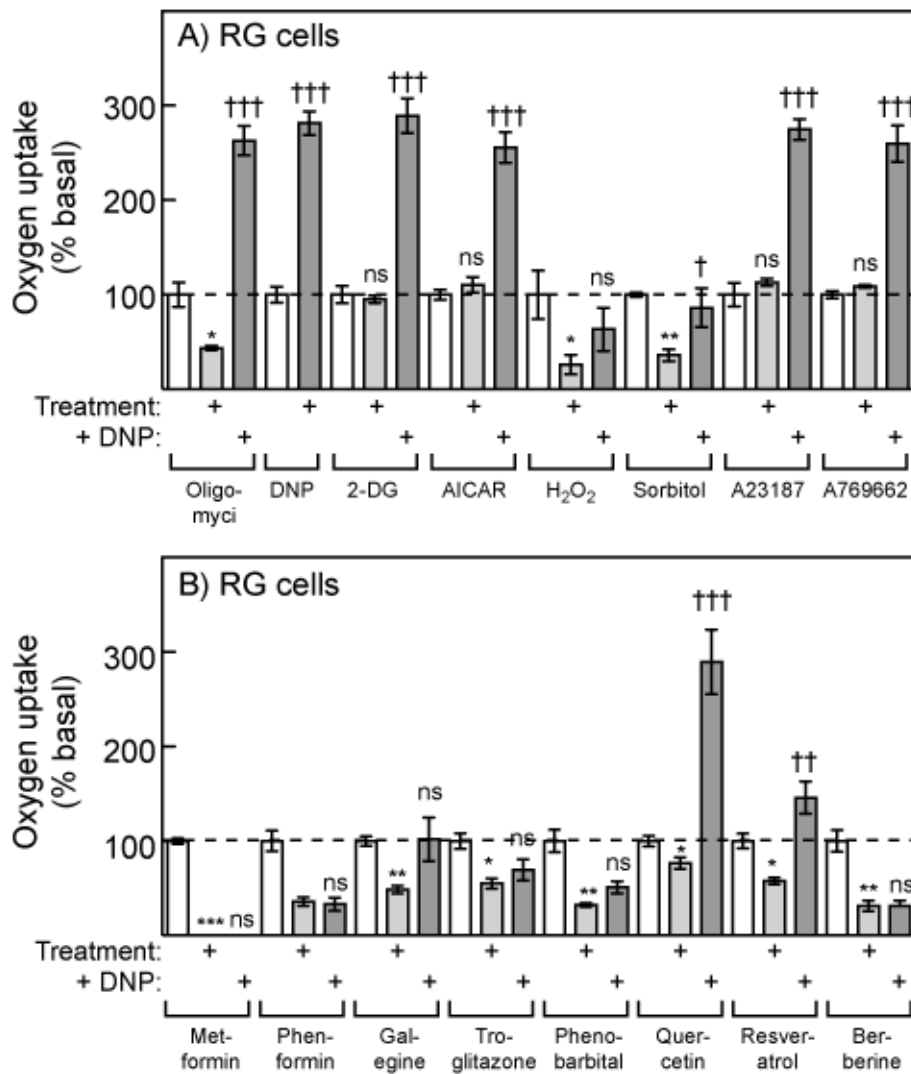

**Figure S1A/B:** Effect of various agents on oxygen uptake in RG cells. Experiments were exactly as for as for Fig. 6A-B except that RG cells replaced WT cells.
